# Supplementary material for: Defining regulatory and phosphoinositide-binding sites in the human WIPI-1 β-propeller responsible for autophagosomal membrane localization downstream of mTORC1 inhibition
Source: PubMed Central journal article supplement (PMC3543385; doi:10.1186/1750-2187-7-16), 2012-10-22
Supplement: 1750-2187-7-16-S3.pdf [file 1750-2187-7-16-S3.pdf]

**Table S1. Confocal microscopy of GFP-WIPI-1 puncta-positive human U2OS cells.**

| Dataset   | 1  |    |       |    | 2  |    |       |    | 3  |    |       |    | Mean (%) |      |       |      |
|-----------|----|----|-------|----|----|----|-------|----|----|----|-------|----|----------|------|-------|------|
|           | CM | RM | RM/WM | WM | CM | RM | RM/WM | WM | CM | RM | RM/WM | WM | CM       | RM   | RM/WM | WM   |
| GFP       | 0  | 0  | 0     | 0  | 0  | 0  | 0     | 0  | 0  | 0  | 0     | 0  | 0.0      | 0.0  | 0.0   | 0.0  |
| GFP-WIPI1 | 18 | 70 | 6     | 5  | 19 | 65 | 11    | 5  | 6  | 68 | 0     | 1  | 14.3     | 67.7 | 5.7   | 3.7  |
| GFP-N23A  | 32 | 66 | 8     | 7  | 30 | 74 | 16    | 6  | 19 | 66 | 6     | 11 | 27.0     | 68.7 | 10.0  | 8.0  |
| GFP-Q24A  | 20 | 79 | 2     | 10 | 26 | 65 | 3     | 2  | 17 | 74 | 1     | 16 | 21.0     | 72.7 | 2.0   | 9.3  |
| GFP-D25A  | 34 | 69 | 10    | 5  | 15 | 64 | 15    | 7  | 11 | 57 | 13    | 7  | 20.0     | 63.3 | 12.7  | 6.3  |
| GFP-E64A  | 23 | 55 | 6     | 12 | 12 | 61 | 9     | 5  | 24 | 44 | 7     | 6  | 19.7     | 53.3 | 7.3   | 7.7  |
| GFP-R107A | 5  | 50 | 5     | 4  | 10 | 59 | 8     | 2  | 20 | 34 | 8     | 2  | 11.7     | 47.7 | 7.0   | 2.7  |
| GFP-R110A | 91 | 96 | 77    | 78 | 98 | 97 | 70    | 83 | 96 | 93 | 71    | 80 | 95.0     | 95.3 | 72.7  | 80.3 |
| GFP-R112A | 1  | 16 | 1     | 5  | 10 | 19 | 5     | 0  | 19 | 16 | 5     | 8  | 10.0     | 17.0 | 3.7   | 4.3  |
| GFP-H185A | 2  | 5  | 0     | 1  | 6  | 7  | 0     | 0  | 6  | 3  | 0     | 1  | 4.7      | 5.0  | 0.0   | 0.7  |
| GFP-G198A | 15 | 34 | 4     | 4  | 5  | 44 | 4     | 0  | 5  | 27 | 5     | 7  | 8.3      | 35.0 | 4.3   | 3.7  |
| GFP-S203A | 0  | 0  | 0     | 0  | 2  | 0  | 0     | 0  | 7  | 1  | 3     | 3  | 3.0      | 0.3  | 1.0   | 1.0  |
| GFP-S205A | 2  | 3  | 0     | 0  | 2  | 1  | 0     | 4  | 2  | 1  | 0     | 0  | 2.0      | 1.7  | 0.0   | 1.3  |
| GFP-G208A | 4  | 4  | 1     | 0  | 0  | 3  | 2     | 2  | 0  | 0  | 0     | 0  | 1.3      | 2.3  | 1.0   | 0.7  |
| GFP-T209A | 2  | 0  | 1     | 0  | 0  | 0  | 0     | 0  | 3  | 0  | 0     | 0  | 1.7      | 0.0  | 0.3   | 0.0  |
| GFP-R212A | 5  | 7  | 3     | 2  | 3  | 1  | 1     | 3  | 5  | 1  | 2     | 3  | 4.3      | 3.0  | 2.0   | 2.7  |
| GFP-E224A | 10 | 67 | 15    | 3  | 15 | 63 | 6     | 6  | 15 | 78 | 10    | 6  | 13.3     | 69.3 | 10.3  | 5.0  |
| GFP-F225A | 1  | 17 | 4     | 9  | 4  | 30 | 0     | 4  | 0  | 38 | 3     | 0  | 1.7      | 28.3 | 2.3   | 4.3  |
| GFP-R226A | 0  | 0  | 0     | 0  | 0  | 0  | 0     | 0  | 0  | 0  | 0     | 0  | 0.0      | 0.0  | 0.0   | 0.0  |
| GFP-R227A | 1  | 1  | 0     | 3  | 0  | 1  | 1     | 0  | 0  | 0  | 1     | 0  | 0.3      | 0.7  | 0.7   | 1.0  |
| GFP-RR    | 3  | 0  | 0     | 0  | 2  | 0  | 0     | 0  | 0  | 0  | 0     | 0  | 1.7      | 0.0  | 0.0   | 0.0  |
| GFP-G228A | 4  | 1  | 0     | 4  | 1  | 0  | 0     | 0  | 1  | 0  | 0     | 0  | 2.0      | 0.3  | 0.0   | 1.3  |
| GFP-S250A | 9  | 71 | 2     | 3  | 8  | 77 | 6     | 2  | 12 | 48 | 2     | 0  | 9.7      | 65.3 | 3.3   | 1.7  |
| GFP-S251A | 0  | 4  | 0     | 0  | 2  | 0  | 2     | 5  | 2  | 3  | 2     | 1  | 1.3      | 2.3  | 1.3   | 2.0  |
| GFP-T255A | 5  | 3  | 1     | 3  | 0  | 0  | 0     | 0  | 1  | 6  | 1     | 0  | 2.0      | 3.0  | 0.7   | 1.0  |
| GFP-H257A | 9  | 5  | 9     | 4  | 0  | 2  | 2     | 0  | 0  | 6  | 0     | 0  | 3.0      | 4.3  | 3.7   | 1.3  |
| GFP-S335A | 15 | 63 | 0     | 0  | 5  | 38 | 1     | 0  | 11 | 62 | 3     | 0  | 10.3     | 54.3 | 1.3   | 0.0  |
| GFP-G336A | 18 | 56 | 2     | 6  | 8  | 33 | 7     | 5  | 15 | 47 | 3     | 0  | 13.7     | 45.3 | 4.0   | 3.7  |

Control medium (CM), rapamycin (RM), wortmannin (WM), rapamycin plus wortmannin (RM/WM).
