# Supplementary material for: Defining regulatory and phosphoinositide-binding sites in the human WIPI-1 β-propeller responsible for autophagosomal membrane localization downstream of mTORC1 inhibition
Source: PubMed Central journal article supplement (PMC3543385; doi:10.1186/1750-2187-7-16), 2012-10-22
Supplement: 1750-2187-7-16-S6.pdf [file 1750-2187-7-16-S6.pdf]

**Table S2. Confocal microscopy of GFP-WIPI-1 puncta-positive human G361 cells.**

| Dataset   | 1 (RM) | 2 (RM) | 3 (RM) | Mean (%) |
|-----------|--------|--------|--------|----------|
| GFP       | 0      | 0      | 0      | 0.0      |
| GFP-WIPI1 | 88     | 91     | 95     | 91.3     |
| GFP-N23A  | 93     | 90     | 91     | 91.3     |
| GFP-Q24A  | 93     | 93     | 91     | 92.3     |
| GFP-D25A  | 88     | 87     | 93     | 89.3     |
| GFP-E64A  | 95     | 90     | 97     | 94.0     |
| GFP-R107A | 94     | 83     | 94     | 90.3     |
| GFP-R110A | 99     | 97     | 92     | 96.0     |
| GFP-R112A | 65     | 39     | 34     | 46.0     |
| GFP-H185  | 27     | 12     | 19     | 19.3     |
| GFP-G198A | 95     | 89     | 93     | 92.3     |
| GFP-S203A | 9      | 1      | 3      | 4.3      |
| GFP-S205A | 0      | 0      | 0      | 0.0      |
| GFP-G208A | 4      | 1      | 0      | 1.7      |
| GFP-T209A | 0      | 0      | 1      | 0.3      |
| GFP-R212A | 0      | 0      | 0      | 0.0      |
| GFP-E224A | 98     | 95     | 93     | 95.3     |
| GFP-F225A | 55     | 38     | 44     | 45.7     |
| GFP-R226A | 0      | 0      | 1      | 0.3      |
| GFP-R227A | 0      | 0      | 0      | 0.0      |
| GFP-RR    | 0      | 0      | 0      | 0.0      |
| GFP-G228A | 0      | 0      | 3      | 1.0      |
| GFP-S250A | 88     | 79     | 79     | 82.0     |
| GFP-S251A | 0      | 1      | 1      | 0.7      |
| GFP-T255A | 0      | 0      | 1      | 0.3      |
| GFP-H257A | 0      | 0      | 0      | 0.0      |
| GFP-S335A | 90     | 95     | 90     | 91.7     |
| GFP-G336A | 95     | 91     | 94     | 93.3     |

**Rapamycin (RM).**
