# Supplementary material for: Defining regulatory and phosphoinositide-binding sites in the human WIPI-1 β-propeller responsible for autophagosomal membrane localization downstream of mTORC1 inhibition
Source: PubMed Central journal article supplement (PMC3543385; doi:10.1186/1750-2187-7-16), 2012-10-22

Suppl. Figure S6

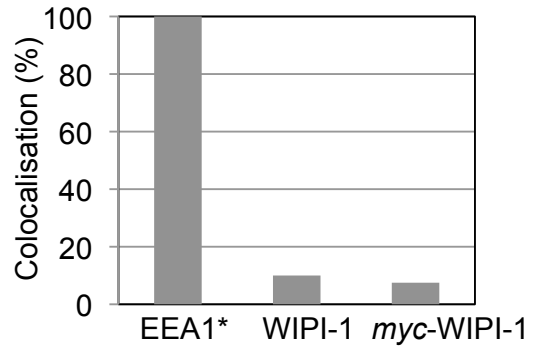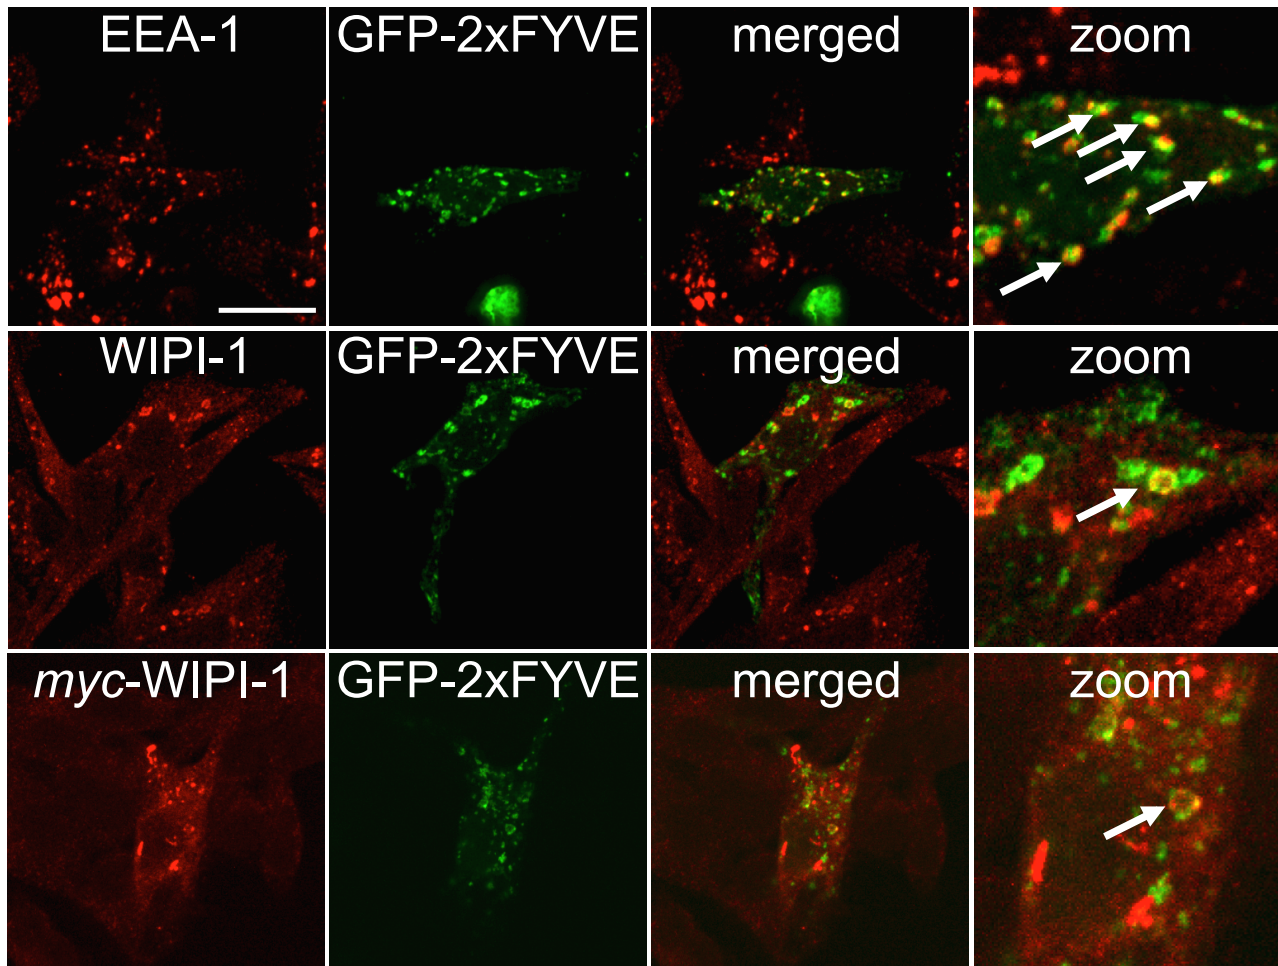

Supplement: 1750-2187-7-16-S8.pdf [file 1750-2187-7-16-S8.pdf]
